# Supplementary material
Source: publisher figshare collection journal article supplement (https://tandf.figshare.com/articles/dataset/_/20337133)
Supplement: Supplementary file 1 [file 1]

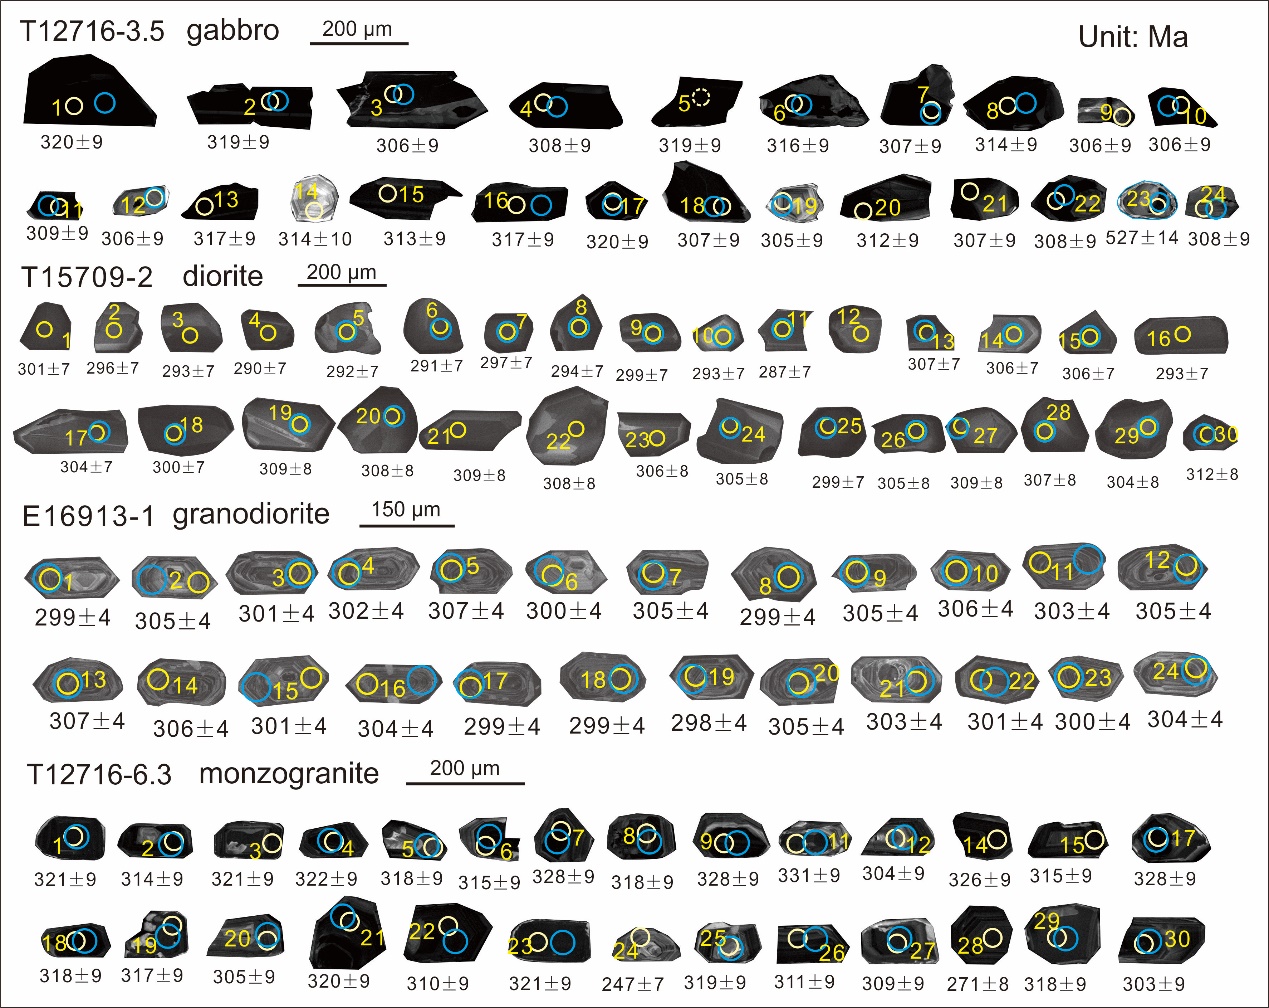


Supplementary Figure 1 Zircon CL images of intrusive rocks from the Kalamaili suture zone. The locations of U-Pb spot analyses are shown as yellow circles and in-situ Hf locations as blue circles.
