# Supplementary material
Source: publisher figshare collection journal article supplement (https://tandf.figshare.com/articles/dataset/_/20337133)
Supplement: Supplementary file 1 [file 1]

Table 1S LA-ICP-MS zircon U–Pb data for Late Carboniferous intrusive rocks

| Spots                           | Contents( $\times 10^{-6}$ ) |                  | Th/U | Ratios                            |            |                                  |            |                                  |            | Ages (Ma)                         |            |                                  |            |                                  |            |
|---------------------------------|------------------------------|------------------|------|-----------------------------------|------------|----------------------------------|------------|----------------------------------|------------|-----------------------------------|------------|----------------------------------|------------|----------------------------------|------------|
|                                 | $^{232}\text{Th}$            | $^{238}\text{U}$ |      | $^{207}\text{Pb}/^{206}\text{Pb}$ | 1 $\sigma$ | $^{207}\text{Pb}/^{235}\text{U}$ | 1 $\sigma$ | $^{206}\text{Pb}/^{238}\text{U}$ | 1 $\sigma$ | $^{207}\text{Pb}/^{206}\text{Pb}$ | 1 $\sigma$ | $^{207}\text{Pb}/^{235}\text{U}$ | 1 $\sigma$ | $^{206}\text{Pb}/^{238}\text{U}$ | 1 $\sigma$ |
| Qinchengnan gabbro              |                              |                  |      |                                   |            |                                  |            |                                  |            |                                   |            |                                  |            |                                  |            |
| T12716-3.5-1                    | 741.4                        | 978.4            | 0.76 | 0.05401                           | 0.0013     | 0.37831                          | 0.0116     | 0.05081                          | 0.0015     | 371                               | 53         | 326                              | 9          | 320                              | 9          |
| T12716-3.5-2                    | 713.0                        | 1088.1           | 0.66 | 0.05243                           | 0.0012     | 0.36643                          | 0.0112     | 0.05070                          | 0.0015     | 304                               | 53         | 317                              | 8          | 319                              | 9          |
| T12716-3.5-3                    | 319.3                        | 345.5            | 0.92 | 0.05293                           | 0.0017     | 0.35493                          | 0.0134     | 0.04865                          | 0.0014     | 326                               | 73         | 308                              | 10         | 306                              | 9          |
| T12716-3.5-4                    | 411.7                        | 997.1            | 0.41 | 0.05373                           | 0.0013     | 0.36250                          | 0.0111     | 0.04894                          | 0.0014     | 360                               | 52         | 314                              | 8          | 308                              | 9          |
| T12716-3.5-5                    | 1544.7                       | 1914.7           | 0.81 | 0.05863                           | 0.0013     | 0.40943                          | 0.0119     | 0.05066                          | 0.0014     | 553                               | 46         | 349                              | 9          | 319                              | 9          |
| T12716-3.5-6                    | 506.3                        | 918.2            | 0.55 | 0.05255                           | 0.0013     | 0.36382                          | 0.0113     | 0.05022                          | 0.0014     | 309                               | 54         | 315                              | 8          | 316                              | 9          |
| T12716-3.5-7                    | 613.7                        | 1935.0           | 0.32 | 0.05249                           | 0.0011     | 0.35334                          | 0.0103     | 0.04883                          | 0.0014     | 307                               | 48         | 307                              | 8          | 307                              | 9          |
| T12716-3.5-8                    | 252.3                        | 837.0            | 0.30 | 0.05295                           | 0.0013     | 0.36396                          | 0.0111     | 0.04987                          | 0.0014     | 326                               | 52         | 315                              | 8          | 314                              | 9          |
| T12716-3.5-9                    | 158.7                        | 376.5            | 0.42 | 0.05239                           | 0.0015     | 0.35098                          | 0.0122     | 0.04860                          | 0.0014     | 303                               | 65         | 306                              | 9          | 306                              | 9          |
| T12716-3.5-10                   | 1542.9                       | 3688.8           | 0.42 | 0.05323                           | 0.0011     | 0.35608                          | 0.0102     | 0.04853                          | 0.0014     | 338                               | 46         | 309                              | 8          | 306                              | 8          |
| T12716-3.5-11                   | 127.0                        | 1693.0           | 0.08 | 0.05261                           | 0.0011     | 0.35639                          | 0.0104     | 0.04914                          | 0.0014     | 312                               | 49         | 310                              | 8          | 309                              | 9          |
| T12716-3.5-12                   | 52.3                         | 172.9            | 0.30 | 0.05431                           | 0.0022     | 0.36432                          | 0.0160     | 0.04867                          | 0.0015     | 384                               | 88         | 315                              | 12         | 306                              | 9          |
| T12716-3.5-13                   | 505.3                        | 1404.5           | 0.36 | 0.05329                           | 0.0012     | 0.37023                          | 0.0109     | 0.05040                          | 0.0014     | 341                               | 49         | 320                              | 8          | 317                              | 9          |
| T12716-3.5-14                   | 38.7                         | 93.9             | 0.41 | 0.05459                           | 0.0032     | 0.37563                          | 0.0225     | 0.04992                          | 0.0016     | 395                               | 125        | 324                              | 17         | 314                              | 10         |
| T12716-3.5-15                   | 424.6                        | 709.3            | 0.60 | 0.05278                           | 0.0013     | 0.36140                          | 0.0113     | 0.04967                          | 0.0014     | 319                               | 55         | 313                              | 8          | 313                              | 9          |
| T12716-3.5-16                   | 762.9                        | 1117.0           | 0.68 | 0.05250                           | 0.0012     | 0.36445                          | 0.0109     | 0.05036                          | 0.0014     | 307                               | 51         | 316                              | 8          | 317                              | 9          |
| T12716-3.5-17                   | 797.4                        | 1309.3           | 0.61 | 0.05287                           | 0.0012     | 0.37105                          | 0.0110     | 0.05091                          | 0.0015     | 323                               | 50         | 320                              | 8          | 320                              | 9          |
| T12716-3.5-18                   | 365.4                        | 1193.4           | 0.31 | 0.05186                           | 0.0012     | 0.34876                          | 0.0104     | 0.04879                          | 0.0014     | 279                               | 51         | 304                              | 8          | 307                              | 9          |
| T12716-3.5-19                   | 99.4                         | 198.0            | 0.50 | 0.05324                           | 0.0021     | 0.35495                          | 0.0155     | 0.04836                          | 0.0014     | 339                               | 88         | 308                              | 12         | 305                              | 9          |
| T12716-3.5-20                   | 527.7                        | 1465.8           | 0.36 | 0.05240                           | 0.0012     | 0.35793                          | 0.0105     | 0.04955                          | 0.0014     | 303                               | 49         | 311                              | 8          | 312                              | 9          |
| T12716-3.5-21                   | 416.0                        | 734.9            | 0.57 | 0.05292                           | 0.0013     | 0.35549                          | 0.0113     | 0.04873                          | 0.0014     | 326                               | 56         | 309                              | 8          | 307                              | 9          |
| T12716-3.5-22                   | 1638.9                       | 3867.0           | 0.42 | 0.05265                           | 0.0011     | 0.35455                          | 0.0101     | 0.04885                          | 0.0014     | 314                               | 46         | 308                              | 8          | 308                              | 9          |
| T12716-3.5-23                   | 305.0                        | 568.5            | 0.54 | 0.05862                           | 0.0014     | 0.6879                           | 0.02105    | 0.08512                          | 0.00243    | 553.1                             | 51.1       | 531.5                            | 13         | 526.6                            | 14         |
| T12716-3.5-24                   | 72.8                         | 225.7            | 0.32 | 0.05248                           | 0.0021     | 0.35431                          | 0.0156     | 0.04897                          | 0.0014     | 306                               | 89         | 308                              | 12         | 308                              | 9          |
| Xiaopu porphyritic monzogranite |                              |                  |      |                                   |            |                                  |            |                                  |            |                                   |            |                                  |            |                                  |            |
| T12716-6.3-1                    | 250.4                        | 468.9            | 0.53 | 0.05489                           | 0.0014     | 0.38633                          | 0.0125     | 0.05106                          | 0.0015     | 408                               | 56         | 332                              | 9          | 321                              | 9          |
| T12716-6.3-2                    | 433.4                        | 1098.7           | 0.39 | 0.05227                           | 0.0012     | 0.35984                          | 0.0108     | 0.04994                          | 0.0014     | 297                               | 51         | 312                              | 8          | 314                              | 9          |
| T12716-6.3-3                    | 303.6                        | 492.5            | 0.62 | 0.05500                           | 0.0014     | 0.38761                          | 0.0125     | 0.05113                          | 0.0015     | 412                               | 57         | 333                              | 9          | 321                              | 9          |
| T12716-6.3-4                    | 511.6                        | 1563.8           | 0.33 | 0.05244                           | 0.0012     | 0.36985                          | 0.0109     | 0.05116                          | 0.0015     | 305                               | 49         | 320                              | 8          | 322                              | 9          |
| T12716-6.3-5                    | 127.7                        | 293.1            | 0.44 | 0.05184                           | 0.0017     | 0.36188                          | 0.0135     | 0.05064                          | 0.0015     | 278                               | 73         | 314                              | 10         | 318                              | 9          |
| T12716-6.3-6                    | 426.2                        | 1240.1           | 0.34 | 0.05279                           | 0.0012     | 0.36457                          | 0.0109     | 0.05010                          | 0.0014     | 320                               | 51         | 316                              | 8          | 315                              | 9          |
| T12716-6.3-7                    | 510.5                        | 1534.9           | 0.33 | 0.05300                           | 0.0012     | 0.38070                          | 0.0112     | 0.05211                          | 0.0015     | 329                               | 50         | 328                              | 8          | 328                              | 9          |
| T12716-6.3-8                    | 289.8                        | 751.9            | 0.39 | 0.05292                           | 0.0013     | 0.36930                          | 0.0114     | 0.05062                          | 0.0014     | 325                               | 54         | 319                              | 8          | 318                              | 9          |
| T12716-6.3-9                    | 321.8                        | 1134.4           | 0.28 | 0.05238                           | 0.0012     | 0.37731                          | 0.0112     | 0.05225                          | 0.0015     | 302                               | 51         | 325                              | 8          | 328                              | 9          |
| T12716-6.3-10                   | 511.3                        | 1083.1           | 0.47 | 0.08120                           | 0.0019     | 0.60889                          | 0.0183     | 0.05440                          | 0.0016     | 1226                              | 45         | 483                              | 12         | 342                              | 10         |
| T12716-6.3-11                   | 288.0                        | 521.9            | 0.55 | 0.05313                           | 0.0014     | 0.38641                          | 0.0126     | 0.05276                          | 0.0015     | 334                               | 59         | 332                              | 9          | 331                              | 9          |
| T12716-6.3-12                   | 116.5                        | 247.1            | 0.47 | 0.05575                           | 0.0021     | 0.37150                          | 0.0153     | 0.04834                          | 0.0014     | 442                               | 81         | 321                              | 11         | 304                              | 9          |
| T12716-6.3-13                   | 371.9                        | 1090.0           | 0.34 | 0.06383                           | 0.0015     | 0.46637                          | 0.0139     | 0.05300                          | 0.0015     | 736                               | 48         | 389                              | 10         | 333                              | 9          |
| T12716-6.3-14                   | 425.3                        | 1111.9           | 0.38 | 0.05739                           | 0.0013     | 0.41087                          | 0.0123     | 0.05193                          | 0.0015     | 506                               | 50         | 350                              | 9          | 326                              | 9          |

| Spots               | Contents( $\times 10^{-6}$ ) |                  | Th/U | Ratios                            |            |                                  |            |                                  |            | Ages (Ma)                         |            |                                  |            |                                  |            |
|---------------------|------------------------------|------------------|------|-----------------------------------|------------|----------------------------------|------------|----------------------------------|------------|-----------------------------------|------------|----------------------------------|------------|----------------------------------|------------|
|                     | $^{232}\text{Th}$            | $^{238}\text{U}$ |      | $^{207}\text{Pb}/^{206}\text{Pb}$ | 1 $\sigma$ | $^{207}\text{Pb}/^{235}\text{U}$ | 1 $\sigma$ | $^{206}\text{Pb}/^{238}\text{U}$ | 1 $\sigma$ | $^{207}\text{Pb}/^{206}\text{Pb}$ | 1 $\sigma$ | $^{207}\text{Pb}/^{235}\text{U}$ | 1 $\sigma$ | $^{206}\text{Pb}/^{238}\text{U}$ | 1 $\sigma$ |
| T12716-6.3-15       | 295.5                        | 885.4            | 0.33 | 0.05211                           | 0.0012     | 0.35940                          | 0.0108     | 0.05004                          | 0.0014     | 290                               | 52         | 312                              | 8          | 315                              | 9          |
| T12716-6.3-16       | 616.6                        | 1721.2           | 0.36 | 0.09720                           | 0.0021     | 0.70649                          | 0.0201     | 0.05272                          | 0.0015     | 1571                              | 39         | 543                              | 12         | 331                              | 9          |
| T12716-6.3-17       | 1966.6                       | 1976.9           | 0.99 | 0.05213                           | 0.0012     | 0.37490                          | 0.0112     | 0.05217                          | 0.0015     | 291                               | 51         | 323                              | 8          | 328                              | 9          |
| T12716-6.3-18       | 564.5                        | 1635.4           | 0.35 | 0.05361                           | 0.0012     | 0.37418                          | 0.0109     | 0.05063                          | 0.0014     | 355                               | 49         | 323                              | 8          | 318                              | 9          |
| T12716-6.3-19       | 334.2                        | 627.7            | 0.53 | 0.05124                           | 0.0013     | 0.35573                          | 0.0110     | 0.05036                          | 0.0014     | 252                               | 56         | 309                              | 8          | 317                              | 9          |
| T12716-6.3-20       | 126.8                        | 511.9            | 0.25 | 0.05216                           | 0.0014     | 0.34812                          | 0.0114     | 0.04841                          | 0.0014     | 293                               | 60         | 303                              | 9          | 305                              | 9          |
| T12716-6.3-21       | 267.8                        | 925.3            | 0.29 | 0.05148                           | 0.0012     | 0.36083                          | 0.0108     | 0.05085                          | 0.0014     | 262                               | 52         | 313                              | 8          | 320                              | 9          |
| T12716-6.3-22       | 401.0                        | 1055.6           | 0.38 | 0.05335                           | 0.0012     | 0.36265                          | 0.0107     | 0.04931                          | 0.0014     | 344                               | 50         | 314                              | 8          | 310                              | 9          |
| T12716-6.3-23       | 269.6                        | 471.2            | 0.57 | 0.05357                           | 0.0014     | 0.37736                          | 0.0121     | 0.05110                          | 0.0015     | 353                               | 58         | 325                              | 9          | 321                              | 9          |
| T12716-6.3-24       | 125.5                        | 170.6            | 0.74 | 0.05628                           | 0.0024     | 0.30292                          | 0.0139     | 0.03905                          | 0.0012     | 463                               | 93         | 269                              | 11         | 247                              | 7          |
| T12716-6.3-25       | 73.9                         | 127.1            | 0.58 | 0.05282                           | 0.0024     | 0.36905                          | 0.0179     | 0.05068                          | 0.0015     | 321                               | 100        | 319                              | 13         | 319                              | 9          |
| T12716-6.3-26       | 223.7                        | 947.2            | 0.24 | 0.05245                           | 0.0012     | 0.35707                          | 0.0106     | 0.04938                          | 0.0014     | 305                               | 51         | 310                              | 8          | 311                              | 9          |
| T12716-6.3-27       | 278.5                        | 351.5            | 0.79 | 0.05278                           | 0.0016     | 0.35670                          | 0.0125     | 0.04903                          | 0.0014     | 319                               | 66         | 310                              | 9          | 309                              | 9          |
| T12716-6.3-28       | 217.3                        | 446.2            | 0.49 | 0.05346                           | 0.0016     | 0.31668                          | 0.0111     | 0.04297                          | 0.0012     | 348                               | 66         | 279                              | 9          | 271                              | 8          |
| T12716-6.3-29       | 160.1                        | 306.5            | 0.52 | 0.05309                           | 0.0017     | 0.36966                          | 0.0135     | 0.05050                          | 0.0015     | 333                               | 70         | 319                              | 10         | 318                              | 9          |
| T12716-6.3-30       | 359.1                        | 955.7            | 0.38 | 0.05337                           | 0.0012     | 0.35414                          | 0.0106     | 0.04814                          | 0.0014     | 344                               | 51         | 308                              | 8          | 303                              | 8          |
| Wuzunbulake diorite |                              |                  |      |                                   |            |                                  |            |                                  |            |                                   |            |                                  |            |                                  |            |
| T15709-2-1          | 90.0                         | 277.4            | 0.32 | 0.05313                           | 0.00150    | 0.34986                          | 0.01039    | 0.04776                          | 0.00115    | 334                               | 63         | 305                              | 8          | 301                              | 7          |
| T15709-2-2          | 82.8                         | 167.4            | 0.49 | 0.05530                           | 0.00174    | 0.35818                          | 0.01163    | 0.04698                          | 0.00116    | 424                               | 68         | 311                              | 9          | 296                              | 7          |
| T15709-2-3          | 78.5                         | 177.7            | 0.44 | 0.05253                           | 0.00171    | 0.33680                          | 0.01131    | 0.04650                          | 0.00114    | 309                               | 72         | 295                              | 9          | 293                              | 7          |
| T15709-2-4          | 108.1                        | 223.9            | 0.48 | 0.05331                           | 0.00156    | 0.33758                          | 0.01037    | 0.04594                          | 0.00112    | 342                               | 65         | 295                              | 8          | 290                              | 7          |
| T15709-2-5          | 81.1                         | 161.5            | 0.50 | 0.05438                           | 0.00174    | 0.34769                          | 0.01151    | 0.04638                          | 0.00115    | 387                               | 70         | 303                              | 9          | 292                              | 7          |
| T15709-2-6          | 80.2                         | 185.8            | 0.43 | 0.05393                           | 0.00168    | 0.34352                          | 0.01109    | 0.04621                          | 0.00114    | 368                               | 69         | 300                              | 8          | 291                              | 7          |
| T15709-2-7          | 65.0                         | 244.3            | 0.27 | 0.05110                           | 0.00148    | 0.33158                          | 0.01013    | 0.04708                          | 0.00115    | 245                               | 66         | 291                              | 8          | 297                              | 7          |
| T15709-2-8          | 137.4                        | 321.4            | 0.43 | 0.05406                           | 0.00142    | 0.34727                          | 0.00980    | 0.04661                          | 0.00113    | 374                               | 58         | 303                              | 7          | 294                              | 7          |
| T15709-2-9          | 113.5                        | 251.8            | 0.45 | 0.05279                           | 0.00149    | 0.34498                          | 0.01030    | 0.04743                          | 0.00116    | 320                               | 63         | 301                              | 8          | 299                              | 7          |
| T15709-2-10         | 62.2                         | 136.4            | 0.46 | 0.05149                           | 0.00189    | 0.32967                          | 0.01233    | 0.04647                          | 0.00118    | 263                               | 82         | 289                              | 9          | 293                              | 7          |
| T15709-2-11         | 82.7                         | 163.9            | 0.50 | 0.05006                           | 0.00173    | 0.31364                          | 0.01115    | 0.04547                          | 0.00114    | 198                               | 78         | 277                              | 9          | 287                              | 7          |
| T15709-2-12         | 109.9                        | 207.9            | 0.53 | 0.11268                           | 0.00285    | 0.72222                          | 0.01946    | 0.04652                          | 0.00115    | 1843                              | 45         | 552                              | 11         | 293                              | 7          |
| T15709-2-13         | 117.0                        | 266.0            | 0.44 | 0.05203                           | 0.00145    | 0.34914                          | 0.01032    | 0.04871                          | 0.00119    | 287                               | 62         | 304                              | 8          | 307                              | 7          |
| T15709-2-14         | 143.5                        | 242.7            | 0.59 | 0.05279                           | 0.00156    | 0.35397                          | 0.01097    | 0.04867                          | 0.00120    | 320                               | 66         | 308                              | 8          | 306                              | 7          |
| T15709-2-15         | 111.9                        | 250.7            | 0.45 | 0.05133                           | 0.00150    | 0.34321                          | 0.01058    | 0.04855                          | 0.00119    | 256                               | 66         | 300                              | 8          | 306                              | 7          |
| T15709-2-16         | 85.3                         | 185.0            | 0.46 | 0.05148                           | 0.00162    | 0.32973                          | 0.01079    | 0.04650                          | 0.00116    | 262                               | 71         | 289                              | 8          | 293                              | 7          |
| T15709-2-17         | 104.0                        | 219.6            | 0.47 | 0.05378                           | 0.00157    | 0.35816                          | 0.01101    | 0.04836                          | 0.00120    | 362                               | 64         | 311                              | 8          | 304                              | 7          |
| T15709-2-18         | 120.6                        | 415.1            | 0.29 | 0.05226                           | 0.00131    | 0.34325                          | 0.00936    | 0.04770                          | 0.00116    | 297                               | 56         | 300                              | 7          | 300                              | 7          |
| T15709-2-19         | 81.1                         | 211.6            | 0.38 | 0.05272                           | 0.00171    | 0.35607                          | 0.01198    | 0.04906                          | 0.00124    | 317                               | 72         | 309                              | 9          | 309                              | 8          |
| T15709-2-20         | 64.2                         | 215.7            | 0.30 | 0.05295                           | 0.00161    | 0.35665                          | 0.01140    | 0.04892                          | 0.00123    | 327                               | 68         | 310                              | 9          | 308                              | 8          |
| T15709-2-21         | 129.8                        | 236.2            | 0.55 | 0.05281                           | 0.00163    | 0.35723                          | 0.01160    | 0.04914                          | 0.00123    | 321                               | 69         | 310                              | 9          | 309                              | 8          |
| T15709-2-22         | 82.6                         | 246.6            | 0.33 | 0.05198                           | 0.00153    | 0.35036                          | 0.01088    | 0.04897                          | 0.00122    | 285                               | 66         | 305                              | 8          | 308                              | 8          |
| T15709-2-23         | 84.2                         | 169.5            | 0.50 | 0.05520                           | 0.00185    | 0.36964                          | 0.01279    | 0.04865                          | 0.00124    | 420                               | 73         | 319                              | 9          | 306                              | 8          |
| T15709-2-24         | 87.5                         | 193.8            | 0.45 | 0.05172                           | 0.00164    | 0.34476                          | 0.01144    | 0.04843                          | 0.00122    | 273                               | 71         | 301                              | 9          | 305                              | 8          |

| Spots               | Contents( $\times 10^{-6}$ ) |                  | Th/U | Ratios                            |            |                                  |            |                                  |            | Ages (Ma)                         |            |                                  |            |                                  |            |
|---------------------|------------------------------|------------------|------|-----------------------------------|------------|----------------------------------|------------|----------------------------------|------------|-----------------------------------|------------|----------------------------------|------------|----------------------------------|------------|
|                     | $^{232}\text{Th}$            | $^{238}\text{U}$ |      | $^{207}\text{Pb}/^{206}\text{Pb}$ | 1 $\sigma$ | $^{207}\text{Pb}/^{235}\text{U}$ | 1 $\sigma$ | $^{206}\text{Pb}/^{238}\text{U}$ | 1 $\sigma$ | $^{207}\text{Pb}/^{206}\text{Pb}$ | 1 $\sigma$ | $^{207}\text{Pb}/^{235}\text{U}$ | 1 $\sigma$ | $^{206}\text{Pb}/^{238}\text{U}$ | 1 $\sigma$ |
| T15709-2-25         | 136.3                        | 340.1            | 0.40 | 0.05044                           | 0.00134    | 0.32970                          | 0.00947    | 0.04750                          | 0.00117    | 215                               | 60         | 289                              | 7          | 299                              | 7          |
| T15709-2-26         | 91.2                         | 211.2            | 0.43 | 0.05205                           | 0.00157    | 0.34722                          | 0.01107    | 0.04849                          | 0.00122    | 287                               | 68         | 303                              | 8          | 305                              | 8          |
| T15709-2-27         | 63.5                         | 201.0            | 0.32 | 0.05295                           | 0.00163    | 0.35579                          | 0.01149    | 0.04884                          | 0.00123    | 326                               | 68         | 309                              | 9          | 307                              | 8          |
| T15709-2-28         | 51.0                         | 172.2            | 0.30 | 0.05167                           | 0.00170    | 0.34852                          | 0.01194    | 0.04903                          | 0.00125    | 271                               | 74         | 304                              | 9          | 309                              | 8          |
| T15709-2-29         | 38.8                         | 128.0            | 0.30 | 0.05440                           | 0.00192    | 0.36073                          | 0.01312    | 0.04820                          | 0.00125    | 388                               | 77         | 313                              | 10         | 304                              | 8          |
| T15709-2-30         | 173.9                        | 406.3            | 0.43 | 0.05089                           | 0.00130    | 0.34681                          | 0.00970    | 0.04954                          | 0.00123    | 236                               | 58         | 302                              | 7          | 312                              | 8          |
| Yiwuxi granodiorite |                              |                  |      |                                   |            |                                  |            |                                  |            |                                   |            |                                  |            |                                  |            |
| EJ16913-1-1         | 191.1                        | 287.6            | 0.66 | 0.05287                           | 0.00162    | 0.34565                          | 0.00874    | 0.04741                          | 0.00060    | 323                               | 68         | 301                              | 7          | 299                              | 4          |
| EJ16913-1-2         | 218.0                        | 268.4            | 0.81 | 0.05337                           | 0.00167    | 0.35675                          | 0.00930    | 0.04848                          | 0.00062    | 345                               | 69         | 310                              | 7          | 305                              | 4          |
| EJ16913-1-3         | 236.4                        | 352.6            | 0.67 | 0.05246                           | 0.00149    | 0.34553                          | 0.00785    | 0.04777                          | 0.00059    | 306                               | 63         | 301                              | 6          | 301                              | 4          |
| EJ16913-1-4         | 254.7                        | 350.2            | 0.73 | 0.05092                           | 0.00158    | 0.33701                          | 0.00870    | 0.04800                          | 0.00060    | 237                               | 70         | 295                              | 7          | 302                              | 4          |
| EJ16913-1-5         | 233.9                        | 352.6            | 0.66 | 0.05240                           | 0.00146    | 0.35258                          | 0.00776    | 0.04880                          | 0.00059    | 303                               | 62         | 307                              | 6          | 307                              | 4          |
| EJ16913-1-6         | 84.3                         | 205.3            | 0.41 | 0.05404                           | 0.00210    | 0.35462                          | 0.01224    | 0.04759                          | 0.00066    | 373                               | 85         | 308                              | 9          | 300                              | 4          |
| EJ16913-1-7         | 195.1                        | 250.3            | 0.78 | 0.05281                           | 0.00189    | 0.35273                          | 0.01101    | 0.04844                          | 0.00065    | 320                               | 80         | 307                              | 8          | 305                              | 4          |
| EJ16913-1-8         | 519.1                        | 485.8            | 1.07 | 0.05387                           | 0.00152    | 0.35223                          | 0.00790    | 0.04742                          | 0.00058    | 365                               | 62         | 306                              | 6          | 299                              | 4          |
| EJ16913-1-9         | 140.2                        | 221.0            | 0.63 | 0.05176                           | 0.00165    | 0.34543                          | 0.00920    | 0.04840                          | 0.00061    | 275                               | 71         | 301                              | 7          | 305                              | 4          |
| EJ16913-1-10        | 314.6                        | 353.8            | 0.89 | 0.05199                           | 0.00147    | 0.34798                          | 0.00783    | 0.04854                          | 0.00059    | 285                               | 63         | 303                              | 6          | 306                              | 4          |
| EJ16913-1-11        | 218.2                        | 317.8            | 0.69 | 0.05337                           | 0.00155    | 0.35454                          | 0.00830    | 0.04818                          | 0.00060    | 345                               | 64         | 308                              | 6          | 303                              | 4          |
| EJ16913-1-12        | 222.4                        | 279.3            | 0.80 | 0.05222                           | 0.00161    | 0.34889                          | 0.00892    | 0.04845                          | 0.00061    | 295                               | 69         | 304                              | 7          | 305                              | 4          |
| EJ16913-1-13        | 184.5                        | 302.1            | 0.61 | 0.05403                           | 0.00158    | 0.36364                          | 0.00861    | 0.04881                          | 0.00061    | 372                               | 64         | 315                              | 6          | 307                              | 4          |
| EJ16913-1-14        | 223.3                        | 323.1            | 0.69 | 0.06359                           | 0.00207    | 0.42555                          | 0.01168    | 0.04853                          | 0.00064    | 728                               | 68         | 360                              | 8          | 306                              | 4          |
| EJ16913-1-15        | 188.5                        | 240.1            | 0.79 | 0.05106                           | 0.00161    | 0.33699                          | 0.00891    | 0.04787                          | 0.00060    | 243                               | 71         | 295                              | 7          | 301                              | 4          |
| EJ16913-1-16        | 161.6                        | 262.7            | 0.62 | 0.05451                           | 0.00171    | 0.36325                          | 0.00946    | 0.04833                          | 0.00061    | 392                               | 68         | 315                              | 7          | 304                              | 4          |
| EJ16913-1-17        | 249.2                        | 349.0            | 0.71 | 0.05248                           | 0.00154    | 0.34394                          | 0.00818    | 0.04753                          | 0.00059    | 306                               | 65         | 300                              | 6          | 299                              | 4          |
| EJ16913-1-18        | 391.8                        | 414.8            | 0.94 | 0.05403                           | 0.00161    | 0.35405                          | 0.00864    | 0.04752                          | 0.00059    | 372                               | 66         | 308                              | 6          | 299                              | 4          |
| EJ16913-1-19        | 353.6                        | 471.4            | 0.75 | 0.05157                           | 0.00150    | 0.33680                          | 0.00793    | 0.04737                          | 0.00058    | 266                               | 65         | 295                              | 6          | 298                              | 4          |
| EJ16913-1-20        | 215.7                        | 306.9            | 0.70 | 0.05340                           | 0.00165    | 0.35665                          | 0.00912    | 0.04844                          | 0.00061    | 346                               | 68         | 310                              | 7          | 305                              | 4          |
| EJ16913-1-21        | 250.7                        | 358.5            | 0.70 | 0.05232                           | 0.00156    | 0.34746                          | 0.00845    | 0.04817                          | 0.00060    | 299                               | 66         | 303                              | 6          | 303                              | 4          |
| EJ16913-1-22        | 433.8                        | 448.6            | 0.97 | 0.05296                           | 0.00147    | 0.34877                          | 0.00760    | 0.04776                          | 0.00058    | 327                               | 62         | 304                              | 6          | 301                              | 4          |
| EJ16913-1-23        | 262.9                        | 381.4            | 0.69 | 0.05418                           | 0.00149    | 0.35561                          | 0.00768    | 0.04760                          | 0.00058    | 378                               | 61         | 309                              | 6          | 300                              | 4          |
| EJ16913-1-24        | 186.2                        | 275.5            | 0.68 | 0.05146                           | 0.00161    | 0.34220                          | 0.00890    | 0.04823                          | 0.00061    | 261                               | 70         | 299                              | 7          | 304                              | 4          |
