# Supplementary material
Source: publisher figshare collection journal article supplement (https://tandf.figshare.com/articles/dataset/_/20337133)
Supplement: Supplementary file 2 [file 1]

Table 4S Nd isotope for the Wuzunbulak pluton

| Sample   | Rock type | Pluton     | Age    | Sm                     | Nd                     | $^{147}\text{Sm}/^{144}\text{Nd}$ | $^{143}\text{Nd}/^{144}\text{Nd}$ | $2\sigma$                    |
|----------|-----------|------------|--------|------------------------|------------------------|-----------------------------------|-----------------------------------|------------------------------|
| T15709-2 | diorite   | Wuzunbulak | 301 Ma | 3.58                   | 15.7                   | 0.1378                            | 0.512772                          | 5                            |
|          |           |            |        | $\epsilon\text{Nd}(0)$ | $\epsilon\text{Nd}(t)$ | $f_{\text{Sm}/\text{Nd}}$         | $T_{\text{DM-1}}(\text{Ma})$      | $T_{\text{DM-2}}(\text{Ma})$ |
|          |           |            |        | 2.6                    | 4.9                    | -0.3                              | 763                               | 667                          |
