# Supplementary material
Source: publisher figshare collection journal article supplement (https://tandf.figshare.com/articles/dataset/_/20337133)
Supplement: Supplementary file 3 [file 1]

Table 3S Zircon Hf isotopic data for Late Carboniferous intrusive rocks from the Kalamaili region

| Spots                           | Age | $^{176}\text{Yb}/^{177}\text{Hf}$ | $^{176}\text{Lu}/^{177}\text{Hf}$ | $^{176}\text{Hf}/^{177}\text{Hf}$ | $2\sigma$ | $\epsilon_{\text{Hf}}(0)$ | $\epsilon_{\text{Hf}}(t)$ | $T_{\text{DM}}(\text{Ma})$ | $T_{\text{DM2}}(\text{Ma})$ | $f_{\text{Lu/Hf}}$ |
|---------------------------------|-----|-----------------------------------|-----------------------------------|-----------------------------------|-----------|---------------------------|---------------------------|----------------------------|-----------------------------|--------------------|
| Qinchengnan gabbro              |     |                                   |                                   |                                   |           |                           |                           |                            |                             |                    |
| T12716-3.5-1                    | 320 | 0.076624                          | 0.002324                          | 0.282833                          | 0.000041  | 2.2                       | 8.7                       | 615                        | 778                         | -0.93              |
| T12716-3.5-2                    | 319 | 0.076486                          | 0.002330                          | 0.282739                          | 0.000027  | -1.2                      | 5.3                       | 755                        | 994                         | -0.93              |
| T12716-3.5-3                    | 306 | 0.083344                          | 0.002353                          | 0.282917                          | 0.000039  | 5.1                       | 11.4                      | 494                        | 596                         | -0.93              |
| T12716-3.5-4                    | 308 | 0.064869                          | 0.001963                          | 0.282733                          | 0.000051  | -1.4                      | 5.0                       | 755                        | 1006                        | -0.94              |
| T12716-3.5-6                    | 316 | 0.072616                          | 0.002171                          | 0.282828                          | 0.000040  | 2.0                       | 8.5                       | 621                        | 790                         | -0.93              |
| T12716-3.5-7                    | 307 | 0.025784                          | 0.000777                          | 0.282818                          | 0.000033  | 1.6                       | 8.2                       | 612                        | 800                         | -0.98              |
| T12716-3.5-8                    | 314 | 0.056063                          | 0.001750                          | 0.282902                          | 0.000034  | 4.6                       | 11.1                      | 507                        | 619                         | -0.95              |
| T12716-3.5-10                   | 306 | 0.024575                          | 0.000670                          | 0.282745                          | 0.000051  | -0.9                      | 5.6                       | 713                        | 964                         | -0.98              |
| T12716-3.5-11                   | 309 | 0.024628                          | 0.000747                          | 0.282695                          | 0.000076  | -2.7                      | 3.9                       | 785                        | 1077                        | -0.98              |
| T12716-3.5-12                   | 306 | 0.027065                          | 0.000728                          | 0.282904                          | 0.000034  | 4.7                       | 11.3                      | 490                        | 603                         | -0.98              |
| T12716-3.5-16                   | 317 | 0.091236                          | 0.002320                          | 0.282776                          | 0.000026  | 0.1                       | 6.6                       | 700                        | 911                         | -0.93              |
| T12716-3.5-17                   | 320 | 0.046205                          | 0.001123                          | 0.282819                          | 0.000016  | 1.7                       | 8.5                       | 616                        | 794                         | -0.97              |
| T12716-3.5-18                   | 307 | 0.082518                          | 0.001881                          | 0.282825                          | 0.000026  | 1.9                       | 8.3                       | 620                        | 797                         | -0.94              |
| T12716-3.5-19                   | 305 | 0.044874                          | 0.001149                          | 0.282845                          | 0.000018  | 2.6                       | 9.0                       | 580                        | 745                         | -0.97              |
| T12716-3.5-22                   | 308 | 0.048154                          | 0.001356                          | 0.282811                          | 0.000013  | 1.4                       | 7.9                       | 632                        | 823                         | -0.96              |
| T12716-3.5-23                   | 527 | 0.021764                          | 0.000516                          | 0.282561                          | 0.000017  | -7.5                      | 4.0                       | 966                        | 1243                        | -0.98              |
| T12716-3.5-24                   | 308 | 0.027804                          | 0.000740                          | 0.282791                          | 0.000021  | 0.7                       | 7.3                       | 649                        | 860                         | -0.98              |
| Xiaopu porphyritic monzogranite |     |                                   |                                   |                                   |           |                           |                           |                            |                             |                    |
| T12716-6.3-1                    | 321 | 0.168392                          | 0.004556                          | 0.283013                          | 0.000022  | 8.5                       | 14.6                      | 374                        | 399                         | -0.86              |
| T12716-6.3-2                    | 314 | 0.058323                          | 0.001751                          | 0.282885                          | 0.000018  | 4.0                       | 10.5                      | 532                        | 657                         | -0.95              |
| T12716-6.3-4                    | 322 | 0.076458                          | 0.002282                          | 0.282890                          | 0.000019  | 4.2                       | 10.8                      | 531                        | 647                         | -0.93              |
| T12716-6.3-5                    | 318 | 0.046727                          | 0.001354                          | 0.282858                          | 0.000018  | 3.0                       | 9.8                       | 564                        | 710                         | -0.96              |
| T12716-6.3-6                    | 315 | 0.052299                          | 0.001543                          | 0.282862                          | 0.000022  | 3.2                       | 9.8                       | 562                        | 705                         | -0.95              |
| T12716-6.3-7                    | 328 | 0.057993                          | 0.001671                          | 0.282923                          | 0.000016  | 5.3                       | 12.2                      | 475                        | 561                         | -0.95              |
| T12716-6.3-8                    | 318 | 0.058711                          | 0.001705                          | 0.282933                          | 0.000017  | 5.7                       | 12.3                      | 462                        | 544                         | -0.95              |
| T12716-6.3-9                    | 328 | 0.052644                          | 0.001611                          | 0.282925                          | 0.000018  | 5.4                       | 12.3                      | 472                        | 555                         | -0.95              |
| T12716-6.3-11                   | 331 | 0.144998                          | 0.003936                          | 0.283081                          | 0.000028  | 10.9                      | 17.4                      | 262                        | 228                         | -0.88              |
| T12716-6.3-12                   | 304 | 0.050943                          | 0.001486                          | 0.282956                          | 0.000024  | 6.5                       | 12.9                      | 425                        | 496                         | -0.96              |
| T12716-6.3-17                   | 328 | 0.512424                          | 0.015077                          | 0.283138                          | 0.000045  | 13.0                      | 16.9                      | 256                        | 256                         | -0.55              |
| T12716-6.3-18                   | 318 | 0.088073                          | 0.002591                          | 0.282918                          | 0.000021  | 5.2                       | 11.6                      | 494                        | 589                         | -0.92              |
| T12716-6.3-19                   | 317 | 0.132596                          | 0.003558                          | 0.283001                          | 0.000028  | 8.1                       | 14.3                      | 382                        | 415                         | -0.89              |
| T12716-6.3-20                   | 305 | 0.037115                          | 0.001120                          | 0.282846                          | 0.000015  | 2.6                       | 9.1                       | 578                        | 742                         | -0.97              |
| T12716-6.3-21                   | 320 | 0.060030                          | 0.001741                          | 0.282860                          | 0.000014  | 3.1                       | 9.8                       | 568                        | 710                         | -0.95              |
| T12716-6.3-22                   | 310 | 0.056987                          | 0.001680                          | 0.282850                          | 0.000014  | 2.8                       | 9.2                       | 581                        | 736                         | -0.95              |
| T12716-6.3-23                   | 321 | 0.143817                          | 0.003662                          | 0.282983                          | 0.000024  | 7.5                       | 13.7                      | 411                        | 455                         | -0.89              |
| T12716-6.3-25                   | 319 | 0.085411                          | 0.002399                          | 0.282912                          | 0.000012  | 5.0                       | 11.5                      | 501                        | 600                         | -0.93              |
| T12716-6.3-26                   | 311 | 0.069710                          | 0.002011                          | 0.282889                          | 0.000014  | 4.2                       | 10.6                      | 529                        | 651                         | -0.94              |
| T12716-6.3-27                   | 309 | 0.356844                          | 0.009020                          | 0.283106                          | 0.000032  | 11.8                      | 16.8                      | 263                        | 250                         | -0.73              |
| T12716-6.3-29                   | 318 | 0.147377                          | 0.003878                          | 0.282955                          | 0.000017  | 6.5                       | 12.7                      | 456                        | 523                         | -0.88              |
| T12716-6.3-30                   | 303 | 0.040241                          | 0.001206                          | 0.282857                          | 0.000015  | 3.0                       | 9.4                       | 563                        | 718                         | -0.96              |
| Wuzunbulak diorite              |     |                                   |                                   |                                   |           |                           |                           |                            |                             |                    |
| T15709-2-1                      | 304 | 0.020741                          | 0.000596                          | 0.282907                          | 0.000025  | 4.8                       | 11.3                      | 485                        | 599                         | -0.98              |
| T15709-2-2                      | 309 | 0.027032                          | 0.000770                          | 0.282989                          | 0.000024  | 7.7                       | 14.2                      | 370                        | 413                         | -0.98              |
| T15709-2-3                      | 307 | 0.026004                          | 0.000710                          | 0.282954                          | 0.000027  | 6.4                       | 12.9                      | 420                        | 494                         | -0.98              |
| T15709-2-4                      | 305 | 0.043335                          | 0.001132                          | 0.282929                          | 0.000030  | 5.5                       | 11.9                      | 460                        | 555                         | -0.97              |
| T15709-2-5                      | 299 | 0.039549                          | 0.001085                          | 0.282960                          | 0.000029  | 6.6                       | 13.0                      | 415                        | 484                         | -0.97              |
| T15709-2-6                      | 312 | 0.051425                          | 0.001346                          | 0.282901                          | 0.000027  | 4.6                       | 10.9                      | 503                        | 622                         | -0.96              |
| T15709-2-7                      | 305 | 0.037900                          | 0.001049                          | 0.283027                          | 0.000026  | 9.0                       | 15.4                      | 319                        | 330                         | -0.97              |
| T15709-2-8                      | 306 | 0.049801                          | 0.001275                          | 0.282958                          | 0.000029  | 6.6                       | 12.9                      | 421                        | 492                         | -0.96              |
| T15709-2-11                     | 308 | 0.024897                          | 0.000718                          | 0.282938                          | 0.000024  | 5.9                       | 12.4                      | 442                        | 529                         | -0.98              |
| T15709-2-12                     | 309 | 0.047635                          | 0.001326                          | 0.283030                          | 0.000028  | 9.1                       | 15.5                      | 317                        | 327                         | -0.96              |
| T15709-2-13                     | 300 | 0.036238                          | 0.001063                          | 0.282968                          | 0.000025  | 6.9                       | 13.3                      | 404                        | 466                         | -0.97              |
| T15709-2-14                     | 304 | 0.059192                          | 0.001554                          | 0.282895                          | 0.000030  | 4.3                       | 10.7                      | 514                        | 638                         | -0.95              |
| T15709-2-15                     | 306 | 0.043723                          | 0.001124                          | 0.283033                          | 0.000025  | 9.2                       | 15.6                      | 311                        | 318                         | -0.97              |
| T15709-2-16                     | 307 | 0.049738                          | 0.001332                          | 0.282962                          | 0.000027  | 6.7                       | 13.1                      | 415                        | 483                         | -0.96              |

| Spots               | Age | $^{176}\text{Yb}/^{177}\text{Hf}$ | $^{176}\text{Lu}/^{177}\text{Hf}$ | $^{176}\text{Hf}/^{177}\text{Hf}$ | $2\sigma$ | $e_{\text{Hf}}(0)$ | $e_{\text{Hf}}(t)$ | $T_{\text{DM}}(\text{Ma})$ | $T_{\text{DM2}}(\text{Ma})$ | $f_{\text{Lu/Hf}}$ |
|---------------------|-----|-----------------------------------|-----------------------------------|-----------------------------------|-----------|--------------------|--------------------|----------------------------|-----------------------------|--------------------|
| T15709-2-17         | 306 | 0.074044                          | 0.001944                          | 0.282916                          | 0.000030  | 5.1                | 11.3               | 489                        | 595                         | -0.94              |
| T15709-2-18         | 287 | 0.049481                          | 0.001348                          | 0.282902                          | 0.000030  | 4.6                | 10.9               | 501                        | 620                         | -0.96              |
| T15709-2-19         | 293 | 0.035993                          | 0.000995                          | 0.282903                          | 0.000028  | 4.6                | 11.1               | 495                        | 612                         | -0.97              |
| T15709-2-20         | 299 | 0.053372                          | 0.001588                          | 0.282897                          | 0.000027  | 4.4                | 10.7               | 511                        | 633                         | -0.95              |
| T15709-2-21         | 294 | 0.039924                          | 0.001161                          | 0.282949                          | 0.000026  | 6.2                | 12.6               | 432                        | 511                         | -0.97              |
| T15709-2-22         | 297 | 0.028824                          | 0.000861                          | 0.282995                          | 0.000023  | 7.9                | 14.3               | 363                        | 401                         | -0.97              |
| T15709-2-23         | 291 | 0.030893                          | 0.000912                          | 0.282886                          | 0.000024  | 4.0                | 10.5               | 518                        | 651                         | -0.97              |
| T15709-2-24         | 292 | 0.039624                          | 0.001169                          | 0.282930                          | 0.000028  | 5.6                | 12.0               | 459                        | 553                         | -0.96              |
| Yiwuxi granodiorite |     |                                   |                                   |                                   |           |                    |                    |                            |                             |                    |
| 16913-1-24          | 304 | 0.055258                          | 0.001796                          | 0.282915                          | 0.000027  | 5.1                | 11.4               | 488                        | 594                         | -0.95              |
| 16913-1-23          | 300 | 0.036677                          | 0.001272                          | 0.282815                          | 0.000018  | 1.5                | 7.9                | 625                        | 815                         | -0.96              |
| 16913-1-22          | 301 | 0.072201                          | 0.002154                          | 0.282932                          | 0.000020  | 5.7                | 11.9               | 468                        | 559                         | -0.94              |
| 16913-1-21          | 303 | 0.048325                          | 0.001582                          | 0.282800                          | 0.000023  | 1.0                | 7.3                | 651                        | 852                         | -0.95              |
| 16913-1-20          | 305 | 0.040746                          | 0.001238                          | 0.282893                          | 0.000015  | 4.3                | 10.7               | 513                        | 638                         | -0.96              |
| 16913-1-19          | 298 | 0.080212                          | 0.002764                          | 0.282870                          | 0.000048  | 3.5                | 9.6                | 568                        | 709                         | -0.92              |
| 16913-1-18          | 299 | 0.036119                          | 0.001177                          | 0.282847                          | 0.000014  | 2.6                | 9.1                | 578                        | 742                         | -0.96              |
| 16913-1-17          | 299 | 0.050482                          | 0.001732                          | 0.282872                          | 0.000029  | 3.5                | 9.9                | 550                        | 691                         | -0.95              |
| 16913-1-16          | 304 | 0.063014                          | 0.001857                          | 0.282882                          | 0.000014  | 3.9                | 10.2               | 537                        | 669                         | -0.94              |
| 16913-1-15          | 301 | 0.031094                          | 0.000953                          | 0.282849                          | 0.000012  | 2.7                | 9.2                | 571                        | 734                         | -0.97              |
| 16913-1-13          | 307 | 0.048453                          | 0.001521                          | 0.282855                          | 0.000024  | 3.0                | 9.3                | 571                        | 727                         | -0.95              |
| 16913-1-13          | 307 | 0.042898                          | 0.001430                          | 0.282856                          | 0.000021  | 3.0                | 9.3                | 569                        | 724                         | -0.96              |
| 16913-1-12          | 305 | 0.050575                          | 0.001732                          | 0.282818                          | 0.000028  | 1.6                | 8.0                | 628                        | 814                         | -0.95              |
| 16913-1-10          | 306 | 0.041220                          | 0.001279                          | 0.282871                          | 0.000016  | 3.5                | 9.9                | 545                        | 689                         | -0.96              |
| 16913-1-11          | 303 | 0.036456                          | 0.001122                          | 0.282862                          | 0.000014  | 3.2                | 9.6                | 555                        | 707                         | -0.97              |
| 16913-1-9           | 305 | 0.051786                          | 0.001678                          | 0.282837                          | 0.000039  | 2.3                | 8.6                | 600                        | 771                         | -0.95              |
| 16913-1-8           | 299 | 0.051498                          | 0.001609                          | 0.282838                          | 0.000018  | 2.3                | 8.7                | 597                        | 767                         | -0.95              |
| 16913-1-7           | 305 | 0.052967                          | 0.001742                          | 0.282731                          | 0.000056  | -1.5               | 4.8                | 754                        | 1013                        | -0.95              |
| 16913-1-6           | 300 | 0.062280                          | 0.002108                          | 0.282842                          | 0.000035  | 2.5                | 8.7                | 599                        | 764                         | -0.94              |
| 16913-1-5           | 307 | 0.045090                          | 0.001471                          | 0.282856                          | 0.000021  | 3.0                | 9.3                | 570                        | 726                         | -0.96              |
