# Supplementary material
Source: publisher figshare collection journal article supplement (https://tandf.figshare.com/articles/dataset/_/20337133)
Supplement: Supplementary file 4 [file 1]

Table 2S Major elements (wt%) and trace elements (ppm) compositions of Late Carboniferous intrusive rocks from the Kalamaili suture zone

| Sample No                        | T12716-3.1   | T12716-3.2  | T12716-3.3  | T12716-3.5  | T15709-2.1               | T15709-2.2 | T15709-2.3 | T15709-2.4 | T15709-2.5 | Detection limits | STD SO-19 |
|----------------------------------|--------------|-------------|-------------|-------------|--------------------------|------------|------------|------------|------------|------------------|-----------|
| Pluton                           | Qinchengnan  |             |             |             | Wuzunbulak               |            |            |            |            |                  |           |
| Rock type                        | gabbro       |             |             |             | diorite                  |            |            |            |            |                  |           |
| SiO <sub>2</sub>                 | 42.71        | 43.11       | 43.04       | 44.20       | 57.10                    | 58.53      | 57.45      | 54.34      | 56.85      | 0.01             | 60.65     |
| Al <sub>2</sub> O <sub>3</sub>   | 20.87        | 19.62       | 19.38       | 21.91       | 16.56                    | 16.68      | 16.80      | 17.69      | 16.54      | 0.01             | 13.98     |
| Fe <sub>2</sub> O <sub>3</sub> T | 11.71        | 12.81       | 13.53       | 11.34       | 6.57                     | 6.44       | 6.17       | 7.64       | 6.58       | 0.04             | 7.41      |
| MgO                              | 6.23         | 7.35        | 6.15        | 4.16        | 4.78                     | 4.37       | 4.59       | 3.30       | 4.93       | 0.01             | 2.90      |
| CaO                              | 11.96        | 11.20       | 10.60       | 11.08       | 7.01                     | 5.87       | 6.46       | 5.93       | 6.97       | 0.01             | 5.84      |
| Na <sub>2</sub> O                | 2.08         | 1.77        | 2.31        | 2.67        | 2.99                     | 3.00       | 3.01       | 3.58       | 2.97       | 0.01             | 4.03      |
| K <sub>2</sub> O                 | 0.55         | 0.39        | 0.81        | 0.76        | 1.88                     | 1.90       | 1.77       | 2.07       | 1.83       | 0.01             | 1.30      |
| TiO <sub>2</sub>                 | 1.76         | 1.98        | 2.06        | 1.58        | 0.62                     | 0.60       | 0.65       | 1.96       | 0.67       | 0.01             | 0.69      |
| P <sub>2</sub> O <sub>5</sub>    | 0.03         | 0.03        | 0.06        | 0.21        | 0.12                     | 0.12       | 0.13       | 0.58       | 0.14       | 0.01             | 0.31      |
| MnO                              | 0.13         | 0.15        | 0.13        | 0.13        | 0.11                     | 0.10       | 0.10       | 0.11       | 0.11       | 0.01             | 0.13      |
| Cr <sub>2</sub> O <sub>3</sub>   | 0.002        | 0.009       | 0.002       | 0.002       | 0.01                     | 0.01       | 0.01       | 0.01       | 0.01       | 0.002            | 0.493     |
| LOI                              | 1.7          | 1.3         | 1.6         | 1.7         | 2.31                     | 2.07       | 2.31       | 2.23       | 2.00       | -5.1             | 1.9       |
| Sum                              | 99.71        | 99.70       | 99.69       | 99.74       | 100.11                   | 99.73      | 99.48      | 99.46      | 99.66      | 0.01             | 99.79     |
| Ba                               | 116          | 103         | 164         | 156         | 326                      | 318        | 277        | 367        | 363        | 1                | 462       |
| Co                               | 35.3         | 42.8        | 46.5        | 31.4        | 19.5                     | 17.8       | 19.2       | 20.2       | 20.8       | 0.2              | 22.5      |
| Cs                               | 1.7          | 0.7         | 2.1         | 1.8         | 0.9                      | 1.1        | 1.2        | 1.3        | 0.9        | 0.1              | 4.3       |
| Ga                               | 22.7         | 19.3        | 21.8        | 23.6        | 15.3                     | 14.8       | 15.7       | 17.7       | 14.3       | 0.5              | 15.6      |
| Hf                               | 1.2          | 1.2         | 1.5         | 1.6         | 4.5                      | 5.0        | 4.4        | 3.5        | 4.3        | 0.1              | 3.0       |
| Nb                               | 2.2          | 2.3         | 3.4         | 3.1         | 3.8                      | 3.8        | 3.7        | 5.5        | 3.4        | 0.1              | 67.2      |
| Rb                               | 10.7         | 6.2         | 23.1        | 23.2        | 47.0                     | 41.8       | 42.5       | 55.2       | 38.2       | 0.1              | 18.9      |
| Sr                               | 700.0        | 615.0       | 652.3       | 836.3       | 400.0                    | 478.4      | 463.0      | 700.0      | 427.6      | 0.5              | 318.7     |
| Ta                               | 0.1          | 0.2         | 0.2         | 0.2         | 0.4                      | 0.2        | 0.4        | 0.4        | 0.4        | 0.1              | 4.6       |
| Th                               | 0.4          | 0.5         | 0.7         | 0.5         | 3.6                      | 3.0        | 3.2        | 2.7        | 3.6        | 0.2              | 13.5      |
| U                                | 0.1          | 0.3         | 0.5         | 0.3         | <0.1                     | 0.3        | <0.1       | 0.6        | 0.2        | 0.1              | 19.0      |
| V                                | 452          | 457         | 553         | 363         | 68                       | 92         | 56         | 267        | 105        | 8                | 163       |
| Zr                               | 32.9         | 33.3        | 38.1        | 40.1        | 161.7                    | 169.4      | 162.6      | 124.1      | 179.3      | 0.1              | 111.1     |
| Y                                | 21.4         | 18.5        | 26.3        | 21.1        | 20.8                     | 19.2       | 19.4       | 20.8       | 21.1       | 0.1              | 35.6      |
| La                               | 5.8          | 5.9         | 7.6         | 9.1         | 13.4                     | 13.2       | 13.0       | 16.4       | 14.2       | 0.1              | 71.2      |
| Ce                               | 15.6         | 14.1        | 20.2        | 22.2        | 29.9                     | 29.7       | 30.2       | 38.0       | 30.4       | 0.1              | 156.3     |
| Pr                               | 2.31         | 2.24        | 3.06        | 3.20        | 3.84                     | 3.70       | 3.81       | 4.96       | 4.06       | 0.02             | 19.02     |
| Nd                               | 12.9         | 11.8        | 16.5        | 16.1        | 15.3                     | 16.0       | 16.6       | 22.0       | 16.6       | 0.3              | 74.7      |
| Sm                               | 3.88         | 3.63        | 4.83        | 3.76        | 3.53                     | 3.39       | 3.72       | 4.95       | 3.90       | 0.05             | 12.56     |
| Eu                               | 1.32         | 1.07        | 1.34        | 1.33        | 0.93                     | 0.92       | 0.87       | 1.33       | 0.88       | 0.02             | 3.65      |
| Gd                               | 4.55         | 3.88        | 5.34        | 4.50        | 3.64                     | 3.50       | 3.52       | 4.71       | 3.74       | 0.05             | 10.47     |
| Tb                               | 0.75         | 0.66        | 0.90        | 0.73        | 0.55                     | 0.53       | 0.55       | 0.71       | 0.61       | 0.01             | 1.35      |
| Dy                               | 4.36         | 3.72        | 5.04        | 4.46        | 3.70                     | 3.43       | 3.36       | 4.21       | 3.61       | 0.05             | 7.28      |
| Ho                               | 0.83         | 0.69        | 1.00        | 0.85        | 0.67                     | 0.66       | 0.67       | 0.86       | 0.76       | 0.02             | 1.34      |
| Er                               | 2.44         | 2.14        | 2.85        | 2.19        | 2.33                     | 1.99       | 1.97       | 2.16       | 2.11       | 0.03             | 3.83      |
| Tm                               | 0.29         | 0.27        | 0.41        | 0.31        | 0.30                     | 0.29       | 0.31       | 0.28       | 0.31       | 0.01             | 0.53      |
| Yb                               | 1.72         | 1.48        | 2.19        | 1.82        | 2.05                     | 2.03       | 2.11       | 2.02       | 2.09       | 0.05             | 3.48      |
| Lu                               | 0.25         | 0.23        | 0.35        | 0.27        | 0.29                     | 0.29       | 0.28       | 0.27       | 0.32       | 0.01             | 0.49      |
| Cu                               | 58.7         | 50.2        | 45.7        | 32.4        | 55.6                     | 67.1       | 58.9       | 33.4       | 79.4       | 0.1              |           |
| Pb                               | 2.1          | 2.1         | 1.8         | 2.1         | 6.6                      | 5.1        | 6.2        | 5.2        | 5.3        | 0.1              |           |
| Ni                               | 6.1          | 15.6        | 5.4         | 4.1         | 46.4                     | 49.9       | 45.2       | 8.7        | 50.1       | 0.1              |           |
| As                               | 1.0          | 0.9         | 0.8         | 1.2         | 11.6                     | 17.0       | 6.3        | 1.5        | 11.8       | 0.5              |           |
| Mg#                              | 55.4         | 57.2        | 51.4        | 46.1        | 62.90                    | 61.26      | 63.42      | 50.17      | 63.58      |                  |           |
| A/CNK                            | 0.81         | 0.83        | 0.81        | 0.86        | 0.84                     | 0.94       | 0.90       | 0.94       | 0.85       |                  |           |
| Sr/Y                             | 32.7         | 33.2        | 24.8        | 39.6        | 19.2                     | 24.9       | 23.9       | 33.7       | 20.3       |                  |           |
| La/Yb                            | 3.4          | 4.0         | 3.5         | 5.0         | 6.5                      | 6.5        | 6.2        | 8.1        | 6.8        |                  |           |
| Sample No                        | EJ16913-1.1  | EJ16913-1.2 | EJ16913-1.3 | EJ16913-1.4 | EJ16913-1.5              | T12716-6.1 | T12716-6.2 | T12716-6.3 | T12716-6.4 | T12716-6.5       |           |
| Pluton                           | Yiwuxi       |             |             |             | Xiaopu                   |            |            |            |            |                  |           |
| Rock type                        | granodiorite |             |             |             | porphyritic monzogranite |            |            |            |            |                  |           |
| SiO <sub>2</sub>                 | 66.45        | 65.63       | 66.76       | 66.58       | 65.35                    | 76.98      | 75.09      | 77.16      | 72.68      | 76.37            |           |
| Al <sub>2</sub> O <sub>3</sub>   | 15.90        | 15.74       | 15.76       | 15.69       | 15.88                    | 11.62      | 13.46      | 12.09      | 14.26      | 11.93            |           |
| Fe <sub>2</sub> O <sub>3</sub> T | 3.70         | 4.34        | 3.72        | 3.79        | 4.28                     | 1.62       | 1.12       | 0.97       | 1.82       | 2.10             |           |
| MgO                              | 1.75         | 2.10        | 1.76        | 1.71        | 2.01                     | 0.06       | 0.01       | 0.07       | 0.19       | 0.03             |           |
| CaO                              | 3.55         | 3.62        | 3.45        | 3.39        | 3.65                     | 0.66       | 0.75       | 0.71       | 0.61       | 0.57             |           |
| Na <sub>2</sub> O                | 3.71         | 3.60        | 3.71        | 3.65        | 3.67                     | 2.79       | 3.45       | 2.97       | 4.19       | 2.94             |           |
| K <sub>2</sub> O                 | 3.38         | 3.36        | 3.29        | 3.51        | 3.34                     | 5.15       | 5.34       | 5.07       | 5.01       | 5.02             |           |
| TiO <sub>2</sub>                 | 0.56         | 0.65        | 0.56        | 0.58        | 0.65                     | 0.09       | 0.02       | 0.05       | 0.14       | 0.08             |           |
| P <sub>2</sub> O <sub>5</sub>    | 0.15         | 0.17        | 0.15        | 0.15        | 0.17                     | 0.01       | 0.01       | 0.01       | 0.03       | 0.01             |           |
| MnO                              | 0.06         | 0.07        | 0.06        | 0.06        | 0.07                     | 0.06       | 0.05       | 0.04       | 0.06       | 0.05             |           |
| Cr <sub>2</sub> O <sub>3</sub>   | 0.004        | 0.005       | 0.005       | 0.005       | 0.006                    | <0.002     | <0.002     | <0.002     | <0.002     | <0.002           |           |
| LOI                              | 0.6          | 0.5         | 0.6         | 0.7         | 0.7                      | 0.9        | 0.6        | 0.8        | 0.9        | 0.8              |           |
| Sum                              | 99.85        | 99.85       | 99.86       | 99.87       | 99.85                    | 99.92      | 99.87      | 99.91      | 99.84      | 99.88            |           |
| Ba                               | 481          | 494         | 431         | 470         | 457                      | 532        | 925        | 681        | 1028       | 880              |           |
| Co                               | 9.1          | 11.2        | 9.6         | 8.5         | 10.4                     | 0.8        | 0.7        | 1.0        | 1.5        | 0.7              |           |
| Cs                               | 5.3          | 6.1         | 5.1         | 4.8         | 5.9                      | 1.1        | 0.8        | 1.4        | 0.9        | 1.1              |           |
| Ga                               | 17.1         | 16.5        | 16.3        | 16.1        | 16.2                     | 10.2       | 12.1       | 10.8       | 13.1       | 11.0             |           |
| Hf                               | 8.0          | 8.6         | 8.1         | 6.8         | 9.1                      | 3.8        | 5.6        | 2.7        | 3.8        | 3.7              |           |
| Nb                               | 8.3          | 8.9         | 8.1         | 7.6         | 8.3                      | 0.9        | 0.5        | 1.1        | 3.4        | 0.4              |           |
| Rb                               | 103.9        | 102.3       | 101.0       | 102.4       | 100.6                    | 94.5       | 84.0       | 75.0       | 85.8       | 78.9             |           |
| Sr                               | 265.0        | 248.5       | 248.9       | 252.7       | 251.5                    | 89.9       | 122.2      | 71.4       | 122.2      | 100.9            |           |
| Ta                               | 0.7          | 0.8         | 0.7         | 0.7         | 0.7                      | 0.1        | 0.1        | 0.1        | 0.1        | 0.7              |           |
| Th                               | 12.5         | 12.6        | 11.7        | 12.6        | 11.5                     | 2.0        | 1.2        | 3.6        | 4.9        | 5.1              |           |
| U                                | 2.0          | 1.7         | 1.5         | 1.9         | 1.7                      | 0.6        | 0.5        | 0.3        | 0.3        | 0.4              |           |
| V                                | 65           | 73          | 63          | 63          | 72                       | <8         | <8         | <8         | 9          | 8                |           |
| Zr                               | 330.9        | 353.2       | 312.2       | 272.8       | 361.1                    | 113.3      | 185.4      | 84.4       | 146.9      | 134.5            |           |
| Y                                | 25.3         | 28.7        | 26.1        | 24.3        | 26.5                     | 2.4        | 4.8        | 3.6        | 11.4       | 2.9              |           |
| La                               | 27.5         | 28.1        | 25.3        | 25.8        | 27.4                     | 14.9       | 7.7        | 21.8       | 29.4       | 23.2             |           |
| Ce                               | 56.3         | 56.1        | 51.6        | 53.5        | 55.9                     | 29.2       | 14.4       | 47.3       | 62.2       | 41.8             |           |
| Pr                               | 6.31         | 6.48        | 5.98        | 5.89        | 6.19                     | 2.77       | 1.37       | 4.42       | 6.31       | 4.28             |           |

|       |       |       |       |       |       |      |      |      |      |      |
|-------|-------|-------|-------|-------|-------|------|------|------|------|------|
| Nd    | 22.8  | 24.3  | 23.1  | 21.4  | 23.7  | 9.5  | 4.9  | 15.0 | 23.0 | 15.4 |
| Sm    | 4.75  | 5.05  | 4.47  | 4.42  | 4.46  | 1.41 | 0.70 | 2.13 | 3.98 | 2.19 |
| Eu    | 1.03  | 1.01  | 0.97  | 0.94  | 0.93  | 0.60 | 0.75 | 0.65 | 0.89 | 0.76 |
| Gd    | 4.50  | 4.92  | 4.40  | 4.18  | 4.36  | 0.88 | 0.61 | 1.28 | 3.42 | 1.54 |
| Tb    | 0.71  | 0.76  | 0.66  | 0.64  | 0.70  | 0.11 | 0.10 | 0.16 | 0.52 | 0.16 |
| Dy    | 4.22  | 4.54  | 4.07  | 3.79  | 4.16  | 0.59 | 0.68 | 0.78 | 2.82 | 0.63 |
| Ho    | 0.86  | 0.94  | 0.80  | 0.79  | 0.89  | 0.09 | 0.18 | 0.12 | 0.52 | 0.11 |
| Er    | 2.46  | 2.81  | 2.55  | 2.33  | 2.47  | 0.29 | 0.55 | 0.34 | 1.30 | 0.30 |
| Tm    | 0.37  | 0.38  | 0.37  | 0.35  | 0.39  | 0.05 | 0.10 | 0.06 | 0.18 | 0.05 |
| Yb    | 2.48  | 2.59  | 2.56  | 2.32  | 2.58  | 0.31 | 0.79 | 0.39 | 0.99 | 0.31 |
| Lu    | 0.38  | 0.41  | 0.39  | 0.34  | 0.40  | 0.08 | 0.17 | 0.07 | 0.17 | 0.06 |
| Cu    | 17.1  | 19.3  | 18.4  | 18.5  | 16.0  | 1.6  | 1.6  | 1.5  | 2.2  | 1.7  |
| Pb    | 2.5   | 2.7   | 2.7   | 3.0   | 3.0   | 3.4  | 6.4  | 4.5  | 5.2  | 5.3  |
| Ni    | 17.0  | 20.0  | 17.6  | 18.3  | 20.1  | 0.9  | 0.9  | 0.8  | 1.1  | 0.9  |
| As    | 2.7   | 2.3   | 1.1   | 13.4  | 3.6   | 4.2  | 1.5  | 1.6  | 1.8  | 3.3  |
| Mg#   | 52.43 | 53.00 | 52.44 | 51.25 | 52.26 | 7.95 | 2.04 | 14.4 | 19.6 | 3.22 |
| A/CNK | 0.98  | 0.98  | 0.99  | 0.98  | 0.97  | 1.02 | 1.05 | 1.04 | 1.06 | 1.06 |
| Sr/Y  | 10.5  | 8.66  | 9.54  | 10.4  | 9.49  | 37.5 | 25.5 | 19.8 | 10.7 | 34.8 |
| La/Yb | 11.1  | 10.8  | 9.9   | 11.1  | 10.6  | 48.1 | 9.7  | 55.9 | 29.7 | 74.8 |
